# Supplementary material
Source: Elsevier journal article supplement (http://darchive.mblwhoilibrary.org/bitstream/handle/1912/7264/mmc2.doc)
Supplement: mmc2 [file mmc2.doc]

Electronic Annex 2 – δ30Si Results

| Sample | Size Fraction (μm)*1,2 | Latitude | Longitude | δ30Si | 2SD δ30Si | δ29Si | 2SD δ29Si | (δ30Si*0.5092) | Location |
| --- | --- | --- | --- | --- | --- | --- | --- | --- | --- |
| BC383 |  | -66.72 | -70.44 |  |  |  |  |  |  |
|  | <2 |  |  | 0.7 | 0.1 | 0.34 | 0.02 | 0.36 | NIGL |
|  |  |  |  |  |  |  |  |  |  |
|  | 2-5 |  |  | 1.04 | 0.1 | 0.53 | 0.02 | 0.53 | NIGL |
|  |  |  |  |  |  |  |  |  |  |
|  | 5-8 |  |  | 1.01 | 0.1 | 0.5 | 0.02 | 0.51 | NIGL |
|  | 5-8 |  |  | 0.93 | 0.1 | 0.49 | 0.02 | 0.47 | NIGL |
|  |  |  |  |  |  |  |  |  |  |
|  | 8-10 |  |  | 0.96 | 0.1 | 0.47 | 0.02 | 0.49 | NIGL |
|  |  |  |  |  |  |  |  |  |  |
|  | 12-20 |  |  | 0.78 | 0.1 | 0.39 | 0.02 | 0.4 | NIGL |
|  | 12-20 |  |  | 0.8 | 0.14 | 0.41 | 0.07 | 0.41 | OXF |
|  |  |  |  |  |  |  |  |  |  |
|  | 20-50 |  |  | -0.53 | 0.1 | -0.25 | 0.02 | -0.27 | NIGL |
|  |  |  |  |  |  |  |  |  |  |
|  | >50 |  |  | -1.21 | 0.07 | -0.59 | 0.11 | -0.62 | OXF |
|  |  |  |  |  |  |  |  |  |  |
|  | Bulk |  |  | 0.39 | 0.1 | 0.18 | 0.03 | 0.3 | NIGL |
|  |  |  |  |  |  |  |  |  |  |
| 385 |  | -68.02 | -70.52 |  |  |  |  |  |  |
|  | <2 |  |  | 0.37 | 0.12 | 0.20 | 0.07 | 0.19 | OXF |
|  |  |  |  |  |  |  |  |  |  |
|  | 2-5 |  |  | 0.91 | 0.15 | 0.47 | 0.07 | 0.48 | OXF |
|  |  |  |  |  |  |  |  |  |  |
|  | 5-8 |  |  | 0.78 | 0.07 | 0.41 | 0.05 | 0.40 | OXF |
|  |  |  |  |  |  |  |  |  |  |
|  | 8-12 |  |  | 0.93 | 0.24 | 0.52 | 0.11 | 0.47 | OXF |
|  |  |  |  |  |  |  |  |  |  |
|  | 12-20 |  |  | 0.82 | 0.15 | 0.39 | 0.09 | 0.42 | OXF |
|  |  |  |  |  |  |  |  |  |  |
|  | 20-50 |  |  | 0.7 | 0.17 | 0.29 | 0.17 | 0.36 | OXF |
|  |  |  |  |  |  |  |  |  |  |
|  | Bulk |  |  | 0.59 | 0.11 | 0.32 | 0.07 | 0.32 | OXF |
|  |  |  |  |  |  |  |  |  |  |
| 391 |  | -67.86 | -68.23 |  |  |  |  |  |  |
|  | <2 |  |  | 0.37 | 0.12 | 0.2 | 0.06 | 0.19 | NIGL |
|  |  |  |  |  |  |  |  |  |  |
|  | 2-5 |  |  | 0.77 | 0.12 | 0.34 | 0.06 | 0.39 | NIGL |
|  |  |  |  |  |  |  |  |  |  |
|  | 5-8 |  |  | 0.76 | 0.12 | 0.34 | 0.06 | 0.39 | NIGL |
|  |  |  |  |  |  |  |  |  |  |
|  | 8-12 |  |  | 0.64 | 0.12 | 0.31 | 0.06 | 0.29 | NIGL |
|  | 8-12 |  |  | 0.56 | 0.12 | 0.27 | 0.06 | 0.23 | NIGL |
|  |  |  |  |  |  |  |  |  |  |
|  | 12-20 |  |  | 0.46 | 0.12 | 0.22 | 0.06 | 0.23 | NIGL |
|  |  |  |  |  |  |  |  |  |  |
|  | 20-50 |  |  | -0.53 | 0.18 | -0.13 | 0.14 | -0.27 | OXF |
|  |  |  |  |  |  |  |  |  |  |
|  | >50 |  |  | -1.84 | 0.21 | -0.88 | 0.18 | -0.27 | OXF |
|  |  |  |  |  |  |  |  |  |  |
|  | Bulk |  |  | 0.47 | 0.12 | 0.24 | 0.06 | 0.24 | NIGL |
|  |  |  |  |  |  |  |  |  |  |
| KC08A |  | -63.34 | -55.87 |  |  |  |  |  |  |
|  | <2 |  |  | -1.14 | 0.16 | -0.56 | 0.11 | -0.58 | OXF |
|  |  |  |  |  |  |  |  |  |  |
|  | 2-5 |  |  | 0.28 | 0.16 | 0.13 | 0.08 | 0.14 | OXF |
|  |  |  |  |  |  |  |  |  |  |
|  | 5-8 |  |  | 0.49 | 0.26 | 0.25 | 0.1 | 0.25 | OXF |
|  |  |  |  |  |  |  |  |  |  |
|  | 8-12 |  |  | 0.05 | 0.16 | -0.03 | 0.11 | 0.03 | OXF |
|  |  |  |  |  |  |  |  |  |  |
|  | 12-20 |  |  | -0.47 | 0.1 | -0.26 | 0.08 | -0.24 | OXF |
|  |  |  |  |  |  |  |  |  |  |
|  | 20-41 |  |  | -1.02 | 0.07 | -0.53 | 0.09 | -0.52 | OXF |
|  |  |  |  |  |  |  |  |  |  |
|  | >41 |  |  | -0.74 | 0.2 | -0.4 | 0.1 | -0.38 | OXF |
|  |  |  |  |  |  |  |  |  |  |
|  | Bulk |  |  | -0.81 | 0.11 | -0.44 | 0.07 | -0.41 | OXF |
|  |  |  |  |  |  |  |  |  |  |
| TAN127 |  | -57.56 | 160.87 |  |  |  |  |  |  |
|  | <2 |  |  | 2.36 | 0.31 | 1.30 | 0.29 | 1.20 | OXF |
|  |  |  |  |  |  |  |  |  |  |
|  | 2-5 |  |  | 1.84 | 0.30 | 0.94 | 0.18 | 0.94 | OXF |
|  | 2-5 |  |  | 1.69 | 0.15 | 0.85 | 0.21 | 0.86 | OXF |
|  |  |  |  |  |  |  |  |  |  |
|  | 5-8 |  |  | 1.78 | 0.25 | 0.91 | 0.22 | 0.91 | OXF |
|  |  |  |  |  |  |  |  |  |  |
|  | 8-12 |  |  | 1.32 | 0.26 | 0.75 | 0.22 | 0.67 | OXF |
|  |  |  |  |  |  |  |  |  |  |
|  | 12-20 |  |  | 1.46 | 0.26 | 0.78 | 0.22 | 0.74 | OXF |
|  | 12-20 |  |  | 1.38 | 0.17 | 0.67 | 0.11 | 0.7 | OXF |
|  |  |  |  |  |  |  |  |  |  |
|  |  |  |  |  |  |  |  |  |  |
|  | 20-41 |  |  | 0.86 | 0.26 | 0.42 | 0.22 | 0.44 | OXF |
|  | 20-41 |  |  | 1.18 | 0.14 | 0.67 | 0.09 | 0.60 | OXF |
|  |  |  |  |  |  |  |  |  |  |
|  |  |  |  |  |  |  |  |  |  |
|  | 41-50 |  |  | 0.8 | 0.19 | 0.4 | 0.21 | 0.41 | OXF |
|  | 41-50 |  |  | 0.9 | 0.24 | 0.49 | 0.13 | 0.46 | OXF |
|  |  |  |  |  |  |  |  |  |  |
|  |  |  |  |  |  |  |  |  |  |
|  |  |  |  |  |  |  |  |  |  |
|  | >50 |  |  | 0.45 | 0.19 | 0.28 | 0.09 | 0.23 | OXF |
|  |  |  |  |  |  |  |  |  |  |
|  | Bulk |  |  | 1.21 | 0.24 | 0.61 | 0.14 | 0.62 | OXF |
|  | Bulk |  |  | 1.68 | 0.26 | 0.88 | 0.25 | 0.86 | OXF |
|  |  |  |  |  |  |  |  |  |  |
| TAN124 |  | -58.69 | 160.23 |  |  |  |  |  |  |
|  | 2-5 |  |  | 1.88 | 0.27 | 0.94 | 0.12 | 0.96 | OXF |
|  | 2-5 |  |  | 1.8 | 0.21 | 1.03 | 0.15 | 0.92 | OXF |
|  |  |  |  |  |  |  |  |  |  |
|  | 5-8 |  |  | 1.71 | 0.3 | 0.93 | 0.19 | 0.87 | OXF |
|  | 5-8 |  |  | 1.76 | 0.15 | 0.93 | 0.13 | 0.9 | OXF |
|  |  |  |  |  |  |  |  |  |  |
|  | 8-12 |  |  | 1.99 | 0.26 | 1.07 | 0.16 | 1.01 | OXF |
|  |  |  |  |  |  |  |  |  |  |
|  | 12-20 |  |  | 1.34 | 0.29 | 0.71 | 0.18 | 0.68 | OXF |
|  |  |  |  |  |  |  |  |  |  |
|  | 20-41 |  |  | 1.24 | 0.22 | 0.62 | 0.15 | 0.63 | OXF |
|  |  |  |  |  |  |  |  |  |  |
|  | 41-50 |  |  | 1.40 | 0.21 | 0.81 | 0.17 | 0.71 | OXF |
|  |  |  |  |  |  |  |  |  |  |
|  | >50 |  |  | -0.05 | 0.15 | 0.00 | 0.15 | -0.03 | OXF |
|  |  |  |  |  |  |  |  |  |  |
|  | Bulk |  |  | 1.67 | 0.39 | 1.02 | 0.22 | 0.85 | OXF |
|  |  |  |  |  |  |  |  |  |  |
| NZ4 |  | -61.77 | 174.42 |  |  |  |  |  |  |
|  | 2-20 |  |  | 2.02 | 0.26 | 1.02 | 0.2 | 1.03 | OXF |
|  | 2-20 |  |  | 1.89 | 0.22 | 0.98 | 0.19 | 0.96 | OXF |
|  |  |  |  |  |  |  |  |  |  |
|  | 20-63 |  |  | 0.72 | 0.16 | 0.37 | 0.16 | 0.37 | OXF |
|  |  |  |  |  |  |  |  |  |  |
| NZ5 |  | -63.11 | -169.74 |  |  |  |  |  |  |
|  | 2-20 |  |  | 1.58 | 0.33 | 0.84 | 0.2 | 0.81 | OXF |
|  | 2-20 |  |  | 1.52 | 0.18 | 0.79 | 0.12 | 0.46 | OXF |
|  |  |  |  |  |  |  |  |  |  |
|  | 20-63 |  |  | 0.9 | 0.16 | 0.47 | 0.12 | 0.46 | OXF |
|  |  |  |  |  |  |  |  |  |  |
| NZ6 |  | -63.29 | 174.78 |  |  |  |  |  |  |
|  | 2-20 |  |  | 1.14 | 0.2 | 0.6 | 0.13 | 0.58 | OXF |
|  |  |  |  |  |  |  |  |  |  |
|  | 20-63 |  |  | 1.36 | 0.16 | 0.67 | 0.08 | 0.69 | OXF |
|  | 20-63 |  |  | 1.32 | 0.12 | 0.63 | 0.07 | 0.67 | OXF |
|  |  |  |  |  |  |  |  |  |  |
| NZ7 |  | -60.42 | -170.19 |  |  |  |  |  |  |
|  | 2-20 |  |  | 1.8 | 0.15 | 0.96 | 0.14 | 0.92 | OXF |
|  |  |  |  |  |  |  |  |  |  |
|  | 20-63 |  |  | 1.38 | 0.12 | 0.7 | 0.1 | 0.7 | OXF |
|  | 20-63 |  |  | 1.15 | 0.2 | 0.57 | 0.1 | 0.59 | OXF |
|  |  |  |  |  |  |  |  |  |  |
| NZ11 |  | -63.63 | -169.32 |  |  |  |  |  |  |
|  | 2-20 |  |  | 1.55 | 0.14 | 0.77 | 0.12 | 0.79 | OXF |
|  | 2-20 |  |  | 1.27 | 0.2 | 0.64 | 0.11 | 0.65 | OXF |
|  |  |  |  |  |  |  |  |  |  |
|  | 20-63 |  |  | 1.62 | 0.15 | 0.82 | 0.12 | 0.82 | OXF |
| 1090-18 |  | -41.81 | 8.9 |  |  |  |  |  |  |
|  | 2-10 |  |  | 1.87 | 0.18 | 0.92 | 0.09 | 0.95 | OXF |
|  | 10-20 |  |  | 1.87 | 0.16 | 0.94 | 0.05 | 0.95 | OXF |
|  | 20-41 |  |  | 0.08 | 0.15 | 0.07 | 0.05 | 0.04 | OXF |
|  |  | -41.81 | 8.9 |  |  |  |  |  |  |
| 1090-20 | 2-10 |  |  | 2.07 | 0.17 | 1.10 | 0.08 | 1.05 | OXF |
|  | 10-20 |  |  | 1.75 | 0.21 | 0.89 | 0.16 | 0.89 | OXF |
|  | 20-41 |  |  | 0.28 | 0.15 | 0.15 | 0.06 | 0.20 | OXF |
|  |  | -41.81 | 8.9 |  |  |  |  |  |  |
| 1090-26 | 2-10 |  |  | 1.89 | 0.15 | 0.97 | 0.12 | 0.96 | OXF |
|  | 20-41 |  |  | 0.71 | 0.07 | 0.36 | 0.03 | 0.36 | OXF |
|  |  | -41.81 | 8.9 |  |  |  |  |  |  |
| 1090-31 | 2-10 |  |  | 1.36 | 0.07 | 0.72 | 0.08 | 0.69 | OXF |
|  | 20-41 |  |  | 0.00 | 0.12 | -0.02 | 0.05 | 0.00 | OXF |

*1Replicates are re-analyses of the same sample aliquot

*2Note samples having replicate analyses are quoted in the text as the average weighted on by the internal 2sd error on the measures, the new error is then calculated as 1/√∑(1/(2σ)2)
